# Supplementary material for: A structural dissection of protein–RNA interactions based on different RNA base areas of interfaces
Source: Royal Society of Chemistry journal article supplement (doi:10.1039/c8ra00598b), 2018-01-01
Supplement: c8ra00598b1.pdf [file c8ra00598b1.pdf]

**Table S1.** The detailed value of  $P_{\text{ribose}}$ ,  $P_{\text{phosphate}}$  and  $P_{\text{base}}$  in the 487 protein-RNA complexes.

| PDB ID | Protein chain | RNA chain | $P_{\text{base}}$ | $P_{\text{phosphate}}$ | $P_{\text{ribose}}$ | PDB ID | Protein Chain | RNA Chain | $P_{\text{base}}$ | $P_{\text{phosphate}}$ | $P_{\text{ribose}}$ |
|--------|---------------|-----------|-------------------|------------------------|---------------------|--------|---------------|-----------|-------------------|------------------------|---------------------|
| 1a9n   | B             | Q         | 62.10             | 15.97                  | 21.93               | 1asy   | A             | R         | 40.42             | 30.80                  | 28.79               |
| 1asz*  | A             | R         | 39.95             | 26.32                  | 33.73               | 1av6   | A             | B         | 14.87             | 43.47                  | 41.66               |
| 1b23   | P             | R         | 24.05             | 28.99                  | 46.96               | 1b7f*  | A             | P         | 65.84             | 11.34                  | 22.81               |
| 1c0a   | A             | B         | 34.93             | 30.62                  | 34.45               | 1c9s   | LMNOPQRSTUW   | W         | 77.80             | 0.48                   | 21.73               |
| 1dfu*  | P             | MN        | 24.63             | 39.95                  | 35.42               | 1di2*  | AB            | CDEG      | 9.52              | 32.87                  | 57.61               |
| 1dk1   | A             | B         | 13.89             | 34.60                  | 51.51               | 1drz   | A             | B         | 62.94             | 19.38                  | 17.68               |
| 1dul   | A             | B         | 37.96             | 13.49                  | 48.55               | 1e7k*  | A             | C         | 56.67             | 30.14                  | 13.18               |
| 1ec6*  | A             | D         | 63.12             | 5.84                   | 31.04               | 1efw*  | A             | C         | 32.79             | 37.45                  | 29.75               |
| 1euy   | A             | B         | 35.34             | 26.47                  | 38.18               | 1exd   | A             | B         | 35.16             | 25.66                  | 39.18               |
| 1f7u*  | A             | B         | 38.62             | 23.49                  | 37.89               | 1f7v   | A             | B         | 38.77             | 22.93                  | 38.30               |
| 1f7y*  | A             | B         | 9.39              | 38.72                  | 51.88               | 1feu   | A             | BC        | 21.66             | 35.30                  | 43.04               |
| 1ffy   | A             | T         | 19.58             | 31.86                  | 48.55               | 1fxl   | A             | B         | 57.93             | 20.47                  | 21.60               |
| 1glx*  | ABC           | DE        | 15.86             | 37.75                  | 46.39               | 1g2e   | A             | B         | 59.22             | 17.71                  | 23.07               |
| 1g59   | A             | B         | 23.52             | 32.01                  | 44.47               | 1gax*  | A             | C         | 37.34             | 23.56                  | 39.10               |
| 1gtf*  | LMNOPQRST     | W         | 78.82             | 5.10                   | 16.06               | 1gtm   | LMNOPQRSTUW   | W         | 75.09             | 4.96                   | 19.95               |
| 1gtr*  | A             | B         | 35.55             | 25.89                  | 38.56               | 1gts   | A             | B         | 36.00             | 25.54                  | 38.47               |
| 1h3e*  | A             | B         | 30.77             | 33.98                  | 35.25               | 1h4q   | AB            | T         | 53.20             | 15.96                  | 30.83               |
| 1h4s   | AB            | T         | 53.44             | 16.14                  | 30.42               | 1hc8   | A             | C         | 13.71             | 30.94                  | 55.35               |
| 1hq1   | A             | B         | 33.74             | 17.70                  | 48.56               | 1i6u*  | A             | C         | 11.62             | 31.50                  | 56.88               |
| 1il2*  | A             | C         | 35.03             | 31.91                  | 33.06               | 1ivs   | A             | C         | 37.29             | 24.06                  | 38.65               |
| 1j1u   | A             | B         | 52.12             | 13.00                  | 34.88               | 1jbr   | AB            | CDF       | 51.48             | 27.93                  | 20.60               |
| 1jbs   | A             | C         | 43.43             | 35.10                  | 21.47               | 1jbt   | A             | C         | 43.61             | 34.45                  | 21.94               |
| 1jld*  | A             | B         | 15.10             | 55.16                  | 29.74               | 1k8w   | A             | B         | 31.95             | 38.88                  | 29.17               |
| 1kq2*  | ABHIKM        | R         | 59.11             | 16.90                  | 23.99               | 1kuq   | A             | B         | 15.99             | 30.00                  | 54.00               |
| 1l9a*  | A             | B         | 15.07             | 57.47                  | 27.45               | 1lng   | A             | B         | 23.99             | 48.59                  | 27.42               |
| 1m5k   | C             | B         | 63.53             | 15.63                  | 20.83               | 1m5o   | C             | B         | 64.24             | 14.76                  | 21.00               |
| 1m5p   | C             | B         | 62.44             | 15.82                  | 21.74               | 1m5v   | C             | B         | 64.08             | 15.38                  | 20.54               |
| 1m8v*  | ABCDEFGH      | OPQRSTU   | 65.97             | 7.87                   | 26.16               | 1m8w*  | A             | C         | 78.04             | 1.88                   | 20.08               |
| 1m8x   | A             | C         | 72.69             | 2.20                   | 25.11               | 1m8y   | A             | C         | 73.64             | 1.52                   | 24.84               |
| 1mji*  | AB            | CD        | 22.10             | 28.42                  | 49.48               | 1mms   | AB            | CD        | 17.31             | 31.50                  | 51.19               |
| 1mzp*  | A             | B         | 10.77             | 45.48                  | 43.75               | 1n35*  | A             | BC        | 18.55             | 36.63                  | 44.81               |
| 1n77   | A             | C         | 23.84             | 29.20                  | 46.96               | 1n78   | A             | C         | 23.63             | 28.89                  | 47.48               |
| 1o0b   | A             | B         | 35.45             | 27.32                  | 37.23               | 1o0c   | A             | B         | 35.54             | 26.49                  | 37.97               |
| 1ooa*  | A             | C         | 48.98             | 38.55                  | 12.47               | 1q2*   | ABCD          | EF        | 41.08             | 27.85                  | 31.07               |
| 1qa6   | A             | C         | 14.08             | 33.40                  | 52.52               | 1qf6*  | A             | B         | 42.07             | 23.01                  | 34.92               |
| 1qrs   | A             | B         | 35.58             | 24.73                  | 39.68               | 1qrt   | A             | B         | 35.55             | 25.23                  | 39.22               |
| 1qru   | A             | B         | 35.33             | 25.72                  | 38.95               | 1qtq   | A             | B         | 35.24             | 26.96                  | 37.80               |
| 1qu2   | A             | T         | 19.58             | 31.86                  | 48.55               | 1qu3*  | A             | T         | 16.19             | 31.97                  | 51.84               |
| 1r3e   | A             | C         | 31.52             | 39.30                  | 29.19               | 1rc7   | A             | BCDE      | 9.19              | 28.14                  | 62.67               |
| 1rlg   | A             | C         | 60.64             | 23.38                  | 15.98               | 1rpu*  | AB            | CD        | 12.85             | 40.06                  | 47.09               |
| 1s03*  | H             | A         | 21.40             | 30.75                  | 47.84               | 1sds*  | A             | D         | 68.16             | 13.21                  | 18.62               |
| 1ser*  | AB            | T         | 12.83             | 46.05                  | 41.12               | 1si3   | A             | B         | 21.63             | 48.88                  | 29.49               |

| Global Data Analysis Report - Q3 2023 |      |      |          |       |       |          |       |        |          |       |       |
|---------------------------------------|------|------|----------|-------|-------|----------|-------|--------|----------|-------|-------|
| Product Line                          |      |      | Region A |       |       | Region B |       |        | Region C |       |       |
| ID                                    | Code | Type | Q1       | Q2    | Q3    | Q1       | Q2    | Q3     | Q1       | Q2    | Q3    |
| 1sj3                                  | P    | R    | 61.80    | 16.38 | 21.82 | 1sj4     | P     | R      | 62.00    | 16.61 | 21.39 |
| 1sjf                                  | A    | B    | 61.20    | 17.06 | 21.73 | 1tfv     | ABCD  | EFGHIJ | 23.76    | 35.88 | 40.36 |
| 1ttt                                  | A    | D    | 19.23    | 28.69 | 52.07 | 1u0b*    | B     | A      | 27.20    | 28.69 | 44.11 |
| 1urn                                  | A    | P    | 65.56    | 11.92 | 22.51 | 1vbx     | A     | B      | 61.82    | 16.12 | 22.06 |
| 1vby                                  | A    | B    | 62.87    | 15.59 | 21.54 | 1vbz     | A     | B      | 62.21    | 15.56 | 22.22 |
| 1vc0                                  | A    | B    | 62.20    | 16.63 | 21.16 | 1vc6     | A     | B      | 61.80    | 16.37 | 21.83 |
| 1wmq                                  | A    | C    | 59.86    | 4.78  | 35.36 | 1wne     | A     | BC     | 24.72    | 31.15 | 44.13 |
| 1wpu                                  | A    | C    | 58.33    | 2.66  | 39.00 | 1wrq     | A     | C      | 60.21    | 3.47  | 36.32 |
| 1wsu*                                 | ABC  | EFG  | 15.00    | 50.00 | 35.00 | 1y39*    | A     | C      | 13.21    | 30.17 | 56.61 |
| 1ytu*                                 | A    | CD   | 33.23    | 34.29 | 32.47 | 1yty     | AB    | CD     | 46.30    | 21.80 | 31.91 |
| 1yvp                                  | A    | CDG  | 47.87    | 30.77 | 21.36 | 1yyo     | AB    | CDEF   | 8.72     | 28.62 | 62.66 |
| 1yz9                                  | AB   | CDEF | 10.18    | 22.51 | 67.31 | 1zbh*    | AD    | EF     | 34.32    | 42.35 | 23.32 |
| 1ze2                                  | AB   | CD   | 26.82    | 37.34 | 35.84 | 1zh5     | AB    | CD     | 47.05    | 21.64 | 31.31 |
| 1zho                                  | E    | F    | 6.80     | 46.59 | 46.61 | 1zjw     | A     | B      | 35.11    | 27.12 | 37.77 |
| 1zl3*                                 | A    | B    | 32.26    | 39.28 | 28.46 | 2a8v*    | B     | E      | 70.63    | 12.26 | 17.10 |
| 2ab4*                                 | A    | B    | 32.38    | 41.25 | 26.37 | 2ann     | A     | B      | 58.23    | 9.99  | 31.78 |
| 2anr                                  | A    | B    | 59.24    | 12.90 | 27.86 | 2asb     | A     | B      | 57.56    | 10.03 | 32.41 |
| 2atw*                                 | A    | B    | 60.23    | 10.63 | 29.14 | 2az0     | AB    | CD     | 6.81     | 42.11 | 51.08 |
| 2az2*                                 | AB   | CD   | 7.22     | 41.77 | 51.01 | 2azx*    | A     | C      | 36.28    | 27.20 | 36.52 |
| 2b3j                                  | AB   | EF   | 51.60    | 19.85 | 28.55 | 2bgg     | A     | PQ     | 33.02    | 32.01 | 34.97 |
| 2bh2*                                 | A    | C    | 47.91    | 19.05 | 33.05 | 2bte*    | A     | B      | 21.05    | 36.34 | 42.61 |
| 2bx2*                                 | L    | R    | 34.51    | 41.10 | 24.40 | 2csx*    | A     | C      | 24.53    | 22.09 | 53.38 |
| 2ct8                                  | A    | C    | 25.46    | 25.56 | 48.98 | 2cv0*    | A     | C      | 23.49    | 29.55 | 46.96 |
| 2cv1                                  | A    | C    | 23.97    | 28.74 | 47.29 | 2cv2     | A     | C      | 23.64    | 28.02 | 48.34 |
| 2db3                                  | B    | F    | 12.65    | 46.67 | 40.68 | 2dlc     | X     | Y      | 58.89    | 9.86  | 31.25 |
| 2dr2                                  | A    | B    | 43.19    | 23.04 | 33.77 | 2dr5     | A     | B      | 21.20    | 37.21 | 41.59 |
| 2dr7                                  | A    | B    | 19.23    | 39.09 | 41.68 | 2dr8     | A     | B      | 23.54    | 38.69 | 37.76 |
| 2dr9                                  | A    | B    | 24.03    | 34.65 | 41.32 | 2dra     | A     | B      | 23.41    | 35.71 | 40.88 |
| 2drb                                  | A    | B    | 25.38    | 33.21 | 41.41 | 2dvi     | A     | B      | 23.82    | 35.12 | 41.05 |
| 2dxi                                  | A    | C    | 23.60    | 29.76 | 46.64 | 2e9r     | X     | AB     | 19.77    | 34.49 | 45.74 |
| 2e9t                                  | A    | BC   | 10.04    | 40.35 | 49.61 | 2e9z     | A     | BC     | 17.54    | 35.44 | 47.02 |
| 2ec0                                  | A    | BC   | 12.59    | 40.52 | 46.89 | 2ez6     | AB    | CD     | 7.97     | 28.67 | 63.36 |
| 2f8k                                  | A    | B    | 39.43    | 44.88 | 15.69 | 2f8s     | A     | CD     | 45.07    | 25.26 | 29.66 |
| 2fk6*                                 | A    | R    | 27.62    | 33.92 | 38.46 | 2fmt*    | A     | C      | 28.01    | 28.36 | 43.63 |
| 2g4b*                                 | A    | B    | 60.89    | 12.00 | 27.11 | 2gic*    | ABCDE | R      | 33.04    | 40.62 | 26.34 |
| 2giw                                  | AB   | EFH  | 40.77    | 24.75 | 34.48 | 2gxb     | AB    | EF     | 8.08     | 60.98 | 30.94 |
| 2hvy                                  | ACD  | E    | 38.01    | 31.67 | 30.32 | 2hw8*    | A     | B      | 6.97     | 42.53 | 50.50 |
| 2hyi                                  | ABCD | F    | 18.63    | 40.45 | 40.93 | 2i82*    | AB    | EF     | 31.30    | 31.52 | 37.19 |
| 2i91*                                 | A    | CD   | 32.25    | 36.98 | 30.77 | 2ix1     | A     | B      | 51.00    | 22.60 | 26.40 |
| 2j0s*                                 | A    | E    | 16.91    | 43.17 | 39.92 | 2jlu*    | A     | C      | 21.82    | 35.24 | 42.94 |
| 2jlv                                  | A    | C    | 23.82    | 34.56 | 41.63 | 2jlw     | A     | C      | 29.86    | 37.06 | 33.09 |
| 2jlx                                  | A    | C    | 29.88    | 33.07 | 37.05 | 2jly     | A     | C      | 31.81    | 31.61 | 36.58 |
| 2jlz                                  | A    | C    | 29.87    | 33.51 | 36.63 | 2nue     | AB    | C      | 6.57     | 34.97 | 58.46 |
| 2nuf                                  | AB   | CD   | 6.82     | 30.16 | 63.02 | 2nug     | AB    | CEDF   | 12.21    | 28.98 | 58.82 |

|       |      |     |       |       |       |       |    |    |       |       |       |
|-------|------|-----|-------|-------|-------|-------|----|----|-------|-------|-------|
| 2nz4  | B    | FQ  | 54.34 | 21.42 | 24.23 | 2oih  | A  | B  | 60.60 | 18.23 | 21.17 |
| 2oj3  | A    | B   | 61.53 | 17.65 | 20.82 | 2ozb* | AB | C  | 49.83 | 34.06 | 16.11 |
| 2pjp  | A    | B   | 52.60 | 38.94 | 8.46  | 2ply  | AB | CE | 29.16 | 47.81 | 23.03 |
| 2po1  | AB   | C   | 34.64 | 34.78 | 30.58 | 2pxb  | A  | B  | 37.82 | 13.57 | 48.61 |
| 2pxd  | A    | B   | 36.65 | 14.54 | 48.82 | 2pxe  | A  | B  | 38.61 | 12.87 | 48.52 |
| 2pxf  | A    | B   | 37.17 | 13.28 | 49.56 | 2pxk  | A  | B  | 36.19 | 15.61 | 48.20 |
| 2pxl  | A    | B   | 36.66 | 14.07 | 49.27 | 2pxp  | A  | B  | 37.83 | 13.04 | 49.13 |
| 2pxq  | A    | B   | 37.01 | 13.38 | 49.62 | 2pxt  | A  | B  | 38.68 | 13.98 | 47.34 |
| 2pxu  | A    | B   | 37.53 | 13.31 | 49.15 | 2pxv  | A  | B  | 35.71 | 17.54 | 46.75 |
| 2py9* | ABCD | EF  | 62.12 | 9.17  | 28.70 | 2qux* | AB | C  | 58.66 | 24.71 | 16.63 |
| 2r7r  | A    | X   | 49.91 | 20.78 | 29.31 | 2r7t  | A  | X  | 50.54 | 22.17 | 27.29 |
| 2r7v  | A    | X   | 33.31 | 38.69 | 27.99 | 2r7w  | A  | X  | 49.99 | 20.73 | 29.28 |
| 2r7x  | A    | X   | 50.40 | 20.81 | 28.79 | 2r8s* | HL | R  | 31.24 | 27.89 | 40.87 |
| 2rd2  | A    | B   | 35.14 | 26.99 | 37.88 | 2re8  | A  | B  | 34.91 | 26.78 | 38.31 |
| 2rfk  | ABC  | DEF | 27.45 | 30.74 | 41.81 | 2uwm  | AB | CD | 28.95 | 46.79 | 24.26 |
| 2v3c* | AC   | M   | 21.76 | 39.35 | 38.89 | 2vnu  | D  | B  | 42.53 | 28.57 | 28.90 |
| 2vod  | A    | C   | 62.33 | 17.55 | 20.13 | 2von  | A  | C  | 62.33 | 18.56 | 19.11 |
| 2vpl  | A    | B   | 7.94  | 38.84 | 53.22 | 2xbm  | AC | F  | 43.90 | 46.90 | 9.20  |
| 2xd0  | A    | G   | 50.38 | 30.01 | 19.61 | 2xdb* | A  | G  | 43.56 | 35.81 | 20.63 |
| 2xli* | A    | B   | 13.00 | 45.00 | 42.00 | 2xlj  | A  | B  | 36.66 | 50.05 | 13.29 |
| 2xlk  | A    | C   | 37.89 | 47.28 | 14.83 | 2xs2* | A  | B  | 56.81 | 18.80 | 24.39 |
| 2xs7  | A    | B   | 56.04 | 18.81 | 25.15 | 2xzl  | A  | B  | 37.70 | 31.10 | 31.20 |
| 2xzo* | A    | D   | 31.27 | 37.48 | 31.25 | 2y8w  | A  | B  | 51.28 | 30.47 | 18.25 |
| 2y8y* | A    | B   | 40.53 | 43.74 | 15.72 | 2y9h  | A  | B  | 31.05 | 49.04 | 19.91 |
| 2ykg  | A    | CD  | 10.33 | 41.51 | 48.16 | 2zh1  | A  | B  | 19.75 | 39.38 | 40.88 |
| 2zh2  | A    | B   | 21.86 | 37.42 | 40.72 | 2zh3  | A  | B  | 22.70 | 36.21 | 41.09 |
| 2zh4  | A    | B   | 23.49 | 36.46 | 40.04 | 2zh5  | A  | B  | 20.98 | 36.81 | 42.20 |
| 2zh6  | A    | B   | 23.40 | 36.00 | 40.60 | 2zh7  | A  | B  | 20.22 | 38.81 | 40.98 |
| 2zh8  | A    | B   | 20.88 | 37.38 | 41.74 | 2zh9* | A  | B  | 19.11 | 38.90 | 41.99 |
| 2zha  | A    | B   | 21.59 | 39.59 | 38.82 | 2zi0* | AB | CD | 31.06 | 62.86 | 6.08  |
| 2zko* | AB   | CD  | 8.43  | 31.26 | 60.30 | 2zm5  | A  | C  | 34.46 | 36.19 | 29.35 |
| 2zue* | A    | B   | 42.66 | 22.13 | 35.20 | 2zuf  | A  | B  | 43.66 | 21.83 | 34.51 |
| 2zxu  | A    | C   | 34.44 | 36.68 | 28.89 | 2zzm  | A  | B  | 38.70 | 28.82 | 32.49 |
| 2zzn* | A    | C   | 33.41 | 34.29 | 32.30 | 3a6p  | A  | DE | 16.91 | 34.64 | 48.44 |
| 3adb  | A    | C   | 24.69 | 35.44 | 39.87 | 3adc* | A  | C  | 38.69 | 35.98 | 25.33 |
| 3add  | A    | C   | 24.27 | 35.13 | 40.60 | 3adl  | A  | BC | 12.08 | 34.83 | 53.08 |
| 3aev* | B    | C   | 59.02 | 14.72 | 26.26 | 3akz  | A  | E  | 25.06 | 30.47 | 44.47 |
| 3am1  | A    | B   | 37.53 | 34.82 | 27.65 | 3amt* | A  | B  | 44.91 | 34.05 | 21.04 |
| 3avu  | A    | GT  | 16.19 | 40.75 | 43.06 | 3avw* | A  | GT | 13.27 | 36.24 | 50.49 |
| 3avx  | A    | GT  | 16.37 | 36.05 | 47.58 | 3avy  | A  | GT | 20.80 | 32.99 | 46.21 |
| 3boy* | ABC  | D   | 62.63 | 5.44  | 31.93 | 3bsb  | B  | C  | 68.91 | 5.44  | 25.66 |
| 3bsn  | A    | PT  | 16.39 | 40.50 | 43.11 | 3bso  | A  | PT | 16.39 | 39.79 | 43.82 |
| 3bsx  | A    | C   | 72.37 | 4.03  | 23.60 | 3bt7* | AB | CD | 29.33 | 30.73 | 39.94 |
| 3bx2* | A    | C   | 69.34 | 2.42  | 28.23 | 3bx3  | A  | C  | 73.56 | 2.04  | 24.41 |

| Global Data Analysis Report - Q3 2023 |          |       |          |       |       |          |           |       |          |       |       |
|---------------------------------------|----------|-------|----------|-------|-------|----------|-----------|-------|----------|-------|-------|
| Product Line                          |          |       | Region A |       |       | Region B |           |       | Region C |       |       |
| ID                                    | Code     | Label | Val1     | Val2  | Val3  | ID       | Code      | Label | Val1     | Val2  | Val3  |
| 3cul                                  | AB       | CD    | 69.49    | 12.66 | 17.84 | 3cun     | AB        | CD    | 67.71    | 13.35 | 18.94 |
| 3d2s                                  | A        | E     | 85.10    | 4.17  | 10.73 | 3dd2*    | H         | B     | 37.70    | 42.50 | 19.80 |
| 3dh3*                                 | AB       | EF    | 28.00    | 35.91 | 36.09 | 3egz     | A         | B     | 62.32    | 19.17 | 18.52 |
| 3eph*                                 | A        | E     | 31.04    | 39.25 | 29.71 | 3eqt*    | AB        | CD    | 23.59    | 38.11 | 38.30 |
| 3ex7                                  | ABCD     | F     | 28.48    | 35.45 | 36.08 | 3fmt     | A         | C     | 29.77    | 35.31 | 34.92 |
| 3foz*                                 | B        | D     | 38.25    | 33.35 | 28.40 | 3ftf*    | A         | CD    | 3.53     | 46.51 | 49.97 |
| 3g0h                                  | A        | E     | 31.56    | 33.66 | 34.78 | 3g8t     | B         | FQ    | 52.41    | 18.84 | 28.75 |
| 3g9c                                  | B        | FQ    | 53.51    | 20.13 | 26.36 | 3h5x*    | A         | PT    | 16.18    | 39.65 | 44.17 |
| 3h5y                                  | A        | PT    | 15.67    | 40.50 | 43.84 | 3hax     | ACD       | EF    | 30.09    | 35.74 | 34.17 |
| 3hhn                                  | B        | C     | 62.27    | 17.24 | 20.49 | 3hjwt    | ABC       | DE    | 32.16    | 32.98 | 34.86 |
| 3i5x                                  | A        | B     | 31.44    | 31.06 | 37.50 | 3i5y     | A         | B     | 32.14    | 32.42 | 35.44 |
| 3i6l                                  | A        | B     | 32.33    | 31.10 | 36.57 | 3i62     | A         | B     | 30.94    | 31.26 | 37.80 |
| 3iab*                                 | AB       | R     | 58.17    | 23.39 | 18.44 | 3ice     | ABCDEFGF  | G     | 22.40    | 35.17 | 42.42 |
| 3iev*                                 | A        | D     | 61.22    | 10.57 | 28.21 | 3irw     | P         | R     | 58.12    | 19.96 | 21.92 |
| 3k49*                                 | A        | B     | 73.50    | 5.01  | 21.48 | 3k5q     | A         | B     | 65.56    | 7.53  | 26.91 |
| 3k5y                                  | A        | B     | 69.71    | 3.19  | 27.10 | 3k5z     | A         | B     | 66.61    | 6.14  | 27.25 |
| 3k6l                                  | A        | B     | 65.23    | 6.29  | 28.48 | 3k62     | A         | B     | 67.03    | 5.01  | 27.95 |
| 3k64                                  | A        | B     | 66.21    | 6.00  | 27.80 | 3kfu     | ABCDEFGHJ | KLMN  | 37.96    | 29.95 | 32.09 |
| 3klv                                  | A        | BC    | 20.44    | 33.71 | 45.85 | 3kms     | A         | BC    | 17.70    | 35.23 | 47.07 |
| 3kna                                  | A        | BC    | 20.71    | 33.86 | 45.44 | 3koa     | A         | BC    | 12.45    | 41.45 | 46.09 |
| 3ks8                                  | AC       | EF    | 16.99    | 36.33 | 46.68 | 3l25     | ABDE      | CF    | 18.09    | 34.84 | 47.06 |
| 3l26                                  | AB       | C     | 21.13    | 41.31 | 37.56 | 3l3c     | B         | FQ    | 52.70    | 21.61 | 25.69 |
| 3lqx                                  | A        | B     | 37.60    | 14.25 | 48.15 | 3lm      | AB        | CD    | 19.62    | 50.70 | 29.68 |
| 3lrr                                  | A        | C     | 20.33    | 46.20 | 33.47 | 3lwo     | ABC       | DE    | 33.60    | 30.76 | 35.64 |
| 3lwp                                  | ABC      | DE    | 32.53    | 32.87 | 34.60 | 3lwq*    | ABC       | DE    | 33.47    | 31.22 | 35.31 |
| 3lwr                                  | ABC      | DE    | 33.69    | 31.07 | 35.23 | 3lww     | ABC       | DE    | 33.90    | 30.99 | 35.11 |
| 3m7n                                  | ABCDEFGH | XYZ   | 32.15    | 30.90 | 36.95 | 3m85     | ABCDEFGH  | XYZ   | 29.84    | 36.92 | 33.24 |
| 3mdg*                                 | A        | C     | 62.62    | 13.08 | 24.30 | 3mdi     | AB        | C     | 57.41    | 14.70 | 27.89 |
| 3mj0                                  | A        | B     | 34.50    | 35.70 | 29.80 | 3moj*    | B         | A     | 52.00    | 28.28 | 19.71 |
| 3mqk                                  | A        | DE    | 35.18    | 31.65 | 33.17 | 3mum     | P         | R     | 63.29    | 15.69 | 21.02 |
| 3mur                                  | P        | R     | 58.32    | 19.68 | 22.00 | 3mut     | P         | R     | 62.56    | 18.38 | 19.06 |
| 3mxh                                  | P        | R     | 60.72    | 17.17 | 22.12 | 3ncu     | AB        | CD    | 25.72    | 46.71 | 27.56 |
| 3ndb                                  | AB       | M     | 27.55    | 35.46 | 37.00 | 3nl0*    | A         | BC    | 14.34    | 37.62 | 48.04 |
| 3nmr                                  | A        | B     | 64.76    | 13.72 | 21.52 | 3nmu     | AGF       | DI    | 45.35    | 28.59 | 26.06 |
| 3nna                                  | A        | B     | 66.25    | 12.19 | 21.56 | 3nnc*    | A         | B     | 70.12    | 10.36 | 19.51 |
| 3nnh                                  | AC       | E     | 64.38    | 10.50 | 25.12 | 3nvi*    | AB        | E     | 43.73    | 29.98 | 26.29 |
| 3o3i*                                 | X        | A     | 34.70    | 24.67 | 40.63 | 3o6e     | X         | A     | 38.13    | 17.17 | 44.70 |
| 3o7v                                  | X        | A     | 39.60    | 15.39 | 45.01 | 3o8c*    | A         | C     | 33.18    | 36.82 | 29.99 |
| 3o8r                                  | A        | BC    | 33.78    | 34.28 | 31.94 | 3og8     | AB        | CD    | 21.59    | 48.81 | 29.61 |
| 3oij                                  | AB       | CD    | 50.09    | 16.31 | 33.60 | 3oin     | AB        | C     | 48.59    | 16.76 | 34.65 |
| 3ol6                                  | A        | BC    | 19.66    | 34.75 | 45.59 | 3ol7     | A         | BC    | 20.32    | 34.02 | 45.66 |
| 3ol8                                  | A        | BC    | 20.23    | 33.85 | 45.92 | 3ol9     | A         | B     | 26.38    | 29.94 | 43.68 |
| 3ola                                  | A        | BC    | 19.05    | 34.74 | 46.21 | 3olb     | A         | BC    | 19.63    | 34.65 | 45.71 |
| 3ouy                                  | A        | C     | 26.35    | 31.33 | 42.32 | 3ov7     | AB        | CD    | 24.42    | 33.02 | 42.56 |

| ID    | Category | Sub-Category | Value 1 | Value 2 | Value 3 | Value 4 | Category    | Sub-Category | Value 5 | Value 6 | Value 7 |
|-------|----------|--------------|---------|---------|---------|---------|-------------|--------------|---------|---------|---------|
| 3ova  | A        | C            | 23.72   | 35.91   | 40.36   | 3ovb    | A           | C            | 29.57   | 29.09   | 41.34   |
| 3ovs  | A        | C            | 25.74   | 32.75   | 41.51   | 3pew    | A           | B            | 26.75   | 37.80   | 35.45   |
| 3pey  | A        | B            | 29.92   | 36.41   | 33.67   | 3pf4    | B           | R            | 40.01   | 4.68    | 55.30   |
| 3q0n  | A        | C            | 72.26   | 2.29    | 25.45   | 3q0o    | A           | C            | 74.39   | 1.21    | 24.40   |
| 3q0q  | A        | B            | 71.28   | 5.75    | 22.97   | 3q0r    | A           | B            | 70.80   | 5.69    | 23.51   |
| 3q0s  | A        | B            | 71.68   | 1.69    | 26.63   | 3qg9    | A           | B            | 71.05   | 4.63    | 24.32   |
| 3qgb  | A        | B            | 71.42   | 2.18    | 26.40   | 3qgc    | A           | B            | 70.19   | 2.96    | 26.86   |
| 3qjj* | A        | Q            | 71.29   | 11.81   | 16.89   | 3qjl    | AB          | XR           | 64.04   | 16.79   | 19.17   |
| 3qrp  | A        | BC           | 42.11   | 38.14   | 19.76   | 3r2c*   | A           | R            | 74.36   | 5.74    | 19.92   |
| 3r2d* | ABJK     | RS           | 6.64    | 45.12   | 48.23   | 3r9w*   | A           | B            | 60.11   | 16.03   | 23.85   |
| 3r9x  | AB       | C            | 49.97   | 23.99   | 26.04   | 3rc8*   | A           | E            | 25.71   | 44.70   | 29.59   |
| 3rer  | ABCDEF   | K            | 49.73   | 17.70   | 32.57   | 3rw6*   | AB          | FH           | 30.65   | 32.84   | 36.51   |
| 3siu  | AB       | C            | 53.05   | 29.49   | 17.46   | 3sn2    | A           | B            | 37.04   | 28.12   | 34.84   |
| 3snp* | AB       | CD           | 37.93   | 28.81   | 33.25   | 3sqw    | A           | B            | 16.39   | 44.71   | 38.90   |
| 3t5n* | A        | C            | 37.36   | 37.37   | 25.27   | 3t5q    | A           | C            | 42.22   | 35.61   | 22.17   |
| 3tmi* | A        | BC           | 7.95    | 43.49   | 48.56   | 3trz    | AB          | UV           | 71.79   | 7.85    | 20.36   |
| 3ts0  | AB       | UV           | 70.14   | 10.86   | 19.00   | 3ts2*   | AB          | UV           | 75.11   | 5.25    | 19.64   |
| 3u4m  | A        | B            | 10.71   | 40.02   | 49.27   | 3u56    | A           | B            | 8.72    | 44.05   | 47.22   |
| 3ucu  | P        | AR           | 57.85   | 19.42   | 22.73   | 3ucz    | P           | R            | 60.83   | 18.40   | 20.77   |
| 3ud4  | P        | R            | 59.91   | 19.15   | 20.94   | 3umy    | A           | B            | 11.67   | 43.44   | 44.89   |
| 3v6y  | A        | B            | 70.09   | 7.02    | 22.90   | 3v71*   | A           | B            | 62.42   | 9.47    | 28.11   |
| 3v74* | A        | B            | 72.59   | 4.14    | 23.27   | 3v7e*   | A           | C            | 67.69   | 20.66   | 11.65   |
| 3vjr* | A        | B            | 13.44   | 36.26   | 50.30   | 3vnv    | A           | GT           | 14.99   | 33.05   | 51.96   |
| 3vyy* | AB       | CDEF         | 7.27    | 34.75   | 57.98   | 3wbn*   | ABCD        | XY           | 8.68    | 55.34   | 35.98   |
| 3zc0* | AB       | M            | 4.44    | 66.17   | 29.39   | 3zd6    | A           | CD           | 11.69   | 46.72   | 41.59   |
| 3zd7  | A        | CD           | 11.21   | 36.94   | 51.85   | 3zgz    | A           | B            | 30.46   | 30.46   | 39.08   |
| 3zjt  | A        | B            | 26.21   | 28.65   | 45.15   | 3zju    | A           | B            | 28.71   | 27.55   | 43.74   |
| 3zjv  | A        | B            | 32.28   | 25.71   | 42.01   | 4al5    | A           | B            | 39.56   | 42.09   | 18.35   |
| 4al6  | A        | B            | 40.81   | 43.12   | 16.07   | 4am3    | ABC         | E            | 57.42   | 15.38   | 27.19   |
| 4aq7  | A        | B            | 30.06   | 30.47   | 39.47   | 4arc*   | A           | B            | 30.85   | 31.78   | 37.37   |
| 4ari  | A        | B            | 26.67   | 31.68   | 41.66   | 4as1    | A           | B            | 31.80   | 27.50   | 40.70   |
| 4ato* | A        | G            | 46.79   | 32.40   | 20.81   | 4ay2    | A           | C            | 9.98    | 44.86   | 45.16   |
| 4b3g  | A        | G            | 42.45   | 29.09   | 28.47   | 4bpb    | A           | CD           | 10.36   | 43.21   | 46.43   |
| 4bw0  | B        | A            | 52.86   | 30.99   | 16.14   | 4c4w    | A           | D            | 62.00   | 20.20   | 17.80   |
| 4c7o* | BD       | E            | 31.61   | 22.33   | 46.06   | 4c8z    | A           | C            | 40.48   | 32.68   | 26.84   |
| 4c9d  | A        | C            | 48.12   | 26.56   | 25.31   | 4e78*   | A           | PT           | 11.44   | 35.63   | 52.92   |
| 4e7a  | A        | PT           | 13.67   | 38.72   | 47.62   | 4ed5*   | A           | D            | 62.37   | 14.32   | 23.31   |
| 4erd* | AB       | CD           | 58.40   | 20.83   | 20.77   | 4f3t*   | A           | R            | 30.86   | 34.35   | 34.78   |
| 4fvu* | A        | BC           | 19.67   | 34.31   | 46.01   | 4gcw    | A           | B            | 25.97   | 35.83   | 38.19   |
| 4gha* | ACEG     | IJ           | 1.70    | 34.98   | 63.32   | 4ghl    | CD          | EF           | 1.83    | 35.61   | 62.56   |
| 4h5p* | AB       | E            | 48.03   | 26.40   | 25.57   | 4ifd    | ABCDEFGHIJK | R            | 29.00   | 29.95   | 41.05   |
| 4ig8* | A        | BC           | 7.05    | 35.42   | 57.52   | 4ill*   | AB          | CR           | 49.01   | 27.07   | 23.92   |
| 4iqx  | A        | BC           | 18.22   | 35.03   | 46.76   | 4j1g    | ABCD        | E            | 42.92   | 26.20   | 30.88   |
| 4j39  | A        | B            | 16.76   | 38.39   | 44.86   | 4j5v    | A           | B            | 17.60   | 37.34   | 45.06   |

|       |         |      |       |       |       |       |         |    |       |       |       |
|-------|---------|------|-------|-------|-------|-------|---------|----|-------|-------|-------|
| 4jgn  | A       | E    | 19.97 | 40.27 | 39.76 | 4jk0  | D       | B  | 22.34 | 36.93 | 40.73 |
| 4jng* | ABCD    | L    | 42.87 | 24.36 | 32.76 | 4jnx  | AD      | BG | 28.64 | 26.85 | 44.52 |
| 4jvy* | A       | D    | 56.82 | 10.91 | 32.27 | 4jxx  | A       | B  | 35.97 | 26.63 | 37.40 |
| 4jxz  | A       | B    | 34.68 | 27.33 | 37.99 | 4jyz  | A       | B  | 33.31 | 27.67 | 39.01 |
| 4k4s  | AE      | BCFG | 18.45 | 34.99 | 46.56 | 4k4t* | A       | BC | 18.81 | 34.02 | 47.16 |
| 4k4u  | A       | BC   | 18.68 | 32.49 | 48.83 | 4k4v  | A       | BC | 17.90 | 35.70 | 46.40 |
| 4k4w  | A       | BC   | 20.07 | 33.45 | 46.48 | 4k4x  | A       | BC | 20.30 | 32.48 | 47.23 |
| 4k4y  | A       | BC   | 19.15 | 34.70 | 46.15 | 4k4z  | A       | BC | 20.13 | 34.29 | 45.59 |
| 4k50* | A       | BC   | 20.21 | 32.07 | 47.72 | 4knq  | A       | B  | 18.70 | 39.63 | 41.67 |
| 4kq0  | AD      | BE   | 14.69 | 37.12 | 48.19 | 4kr6* | AB      | CD | 34.21 | 23.88 | 41.91 |
| 4kre  | A       | R    | 29.91 | 34.26 | 35.83 | 4krf  | A       | R  | 31.72 | 35.40 | 32.88 |
| 4kxt  | A       | B    | 28.15 | 36.66 | 35.19 | 4kzd  | HL      | R  | 54.08 | 26.01 | 19.91 |
| 4kze  | HL      | R    | 54.48 | 26.24 | 19.28 | 4l8h  | AB      | R  | 35.53 | 39.62 | 24.85 |
| 4l8r  | E       | D    | 35.93 | 35.59 | 28.49 | 4lg2  | B       | EF | 32.94 | 41.34 | 25.72 |
| 4lgt* | A       | E    | 40.74 | 29.78 | 29.48 | 4lmz  | A       | B  | 56.26 | 16.30 | 27.44 |
| 4m2z  | AB      | CD   | 8.76  | 28.91 | 62.33 | 4m30  | AB      | CD | 7.64  | 28.66 | 63.70 |
| 4m59* | AB      | CD   | 43.93 | 18.34 | 37.72 | 4m7a  | ABCDEFG | P  | 67.92 | 10.62 | 21.46 |
| 4m7d  | ABCDEFG | P    | 68.48 | 9.91  | 21.60 | 4mdx* | AB      | C  | 63.76 | 14.47 | 21.77 |
| 4n0t* | A       | B    | 54.87 | 17.46 | 27.67 | 4n2q  | A       | B  | 40.84 | 34.94 | 24.22 |
| 4ngb  | A       | B    | 39.53 | 38.53 | 21.94 | 4ngc* | A       | B  | 36.47 | 39.98 | 23.54 |
| 4ngd  | A       | B    | 38.75 | 38.65 | 22.60 | 4ngg  | A       | B  | 34.44 | 29.47 | 36.09 |
| 4nh3  | A       | B    | 41.76 | 36.03 | 22.21 | 4nh5  | A       | B  | 44.42 | 30.88 | 24.69 |
| 4nh6  | A       | B    | 43.53 | 33.94 | 22.53 | 4o26  | AB      | EF | 34.60 | 28.24 | 37.15 |
| 4o8j  | A       | E    | 38.76 | 35.16 | 26.08 | 4oe1  | AB      | DC | 43.93 | 18.42 | 37.65 |
| 4ola  | A       | B    | 25.98 | 39.20 | 34.82 | 4olb  | A       | B  | 26.26 | 38.65 | 35.09 |
| 4oog* | C       | D    | 23.01 | 30.55 | 46.44 |       |         |    |       |       |       |

\* The 137 non-redundant complexes are marked with an asterisk(\*)

**Table S2.** Detailed information of 137 protein-RNA complexes including the final data and all of properties.

Chain id: Chain ids in the PDB entry.

Res(Å): Resolution of the X-ray structure.

RNA type: We only considered the four common types of RNA, ssRNA, dsRNA, tRNA and rRNA, respectively, mRNA was classified as ssRNA in our study.

PISA(kcal/Mol): The solvation free energy gain upon formation of the interface.

B(Å<sup>2</sup>): Interface area.

Surface area B ratio (%): The ratio of the interface area to the rest of the surface area.

N\_atoms: Number of interface atoms.

N\_residues/N\_nucleotides: Number of interface amino acid residues and interface nucleotides.

N\_hb: Number of H-bonds between amino acids and nucleotides at the protein-RNA interface.

P\_e(%): Percent-overlap between the largest electrostatic positive patches on protein surfaces and the binding interface.

EEL(kcal/mol): Electrostatic energy.

N\_stacking: Number of stacking interactions at protein-RNA interface.

N\_vdw: Number of van der waals contacts.

N\_hp: Number of hydrophobic interactions.

P\_hp(%): Percentage of hydrophobic interface in total binding interface.

|        | Chain id  |         | Res(Å) | RNA type      | PISA  | B(Å <sup>2</sup> ) |        |        | Surface area B ratio (%) |      |      | N_atoms |     |     | N_residues / |     | N_hb | P_e(%) | EEL      | N_stacking | N_vdw | N_hp | P_hp(%) |
|--------|-----------|---------|--------|---------------|-------|--------------------|--------|--------|--------------------------|------|------|---------|-----|-----|--------------|-----|------|--------|----------|------------|-------|------|---------|
|        | Pro       | RNA     |        |               |       | All                | Pro    | RNA    | All                      | Pro  | RNA  | All     | Pro | RNA | Pro          | RNA |      |        |          |            |       |      |         |
|        |           |         |        |               |       |                    |        |        |                          |      |      |         |     |     |              |     |      |        |          |            |       |      |         |
| High   |           |         |        |               |       |                    |        |        |                          |      |      |         |     |     |              |     |      |        |          |            |       |      |         |
| 1B7F   | A         | P       | 2.6    | Miscellaneous | -21.7 | 2937               | 1339.2 | 1597.8 | 28.1                     | 13.4 | 46.7 | 320     | 173 | 147 | 48           | 10  | 24   | 96     | -2112.2  | 5          | 189   | 379  | 79      |
| 1E7K   | A         | C       | 2.9    | sRNA          | -8.3  | 1299.9             | 620.5  | 679.4  | 14.5                     | 8.7  | 21.7 | 148     | 68  | 80  | 19           | 9   | 15   | 74     | -2061.8  | 0          | 88    | 99   | 74      |
| 1EC6   | A         | D       | 2.4    | ssRNA         | -8    | 1854               | 905.9  | 948    | 22.4                     | 15.4 | 22.3 | 205     | 97  | 108 | 30           | 13  | 13   | 83     | -2247.3  | 1          | 95    | 166  | 67      |
| 1GTF   | LMNOPQRST | W       | 1.75   | mRNA          | -20.2 | 7913               | 3590.6 | 4322.4 | 25.5                     | 14   | 32.6 | 901     | 462 | 439 | 162          | 39  | 71   | 38     | 851.8    | 9          | 384   | 949  | 51      |
| 1KQ2   | ABHIKM    | R       | 2.71   | rRNA          | -33.6 | 3025.6             | 1353.6 | 1671.9 | 17.8                     | 7.6  | 76.2 | 320     | 190 | 130 | 44           | 7   | 22   | 39     | -185.0   | 5          | 182   | 414  | 84      |
| 1M8V   | ABCDEFGH  | OPQRSTU | 2.6    | Miscellaneous | -10   | 6572.7             | 2984   | 3588.7 | 19.5                     | 10   | 34.8 | 734     | 379 | 355 | 111          | 27  | 87   | 18     | -3751.3  | 14         | 208   | 475  | 28      |
| 1M8W   | A         | C       | 2.2    | mRNA          | -2.7  | 2109.8             | 946.5  | 1163.3 | 12.3                     | 5.7  | 43.5 | 217     | 113 | 104 | 38           | 7   | 11   | 0      | -402.2   | 10         | 149   | 255  | 71      |
| 1SDS   | A         | D       | 1.8    | mRNA          | -9    | 851.7              | 369.4  | 482.4  | 10                       | 6.4  | 13.3 | 89      | 40  | 49  | 16           | 4   | 9    | 25     | -120.8   | 0          | 51    | 91   | 94      |
| 2A8V   | B         | E       | 2.4    | ssRNA         | -2.2  | 719.2              | 281.1  | 438.1  | 8.6                      | 3.9  | 23.1 | 88      | 52  | 36  | 16           | 4   | 8    | 25     | 64.7     | 2          | 32    | 117  | 63      |
| 2ATW   | A         | B       | 2.25   | dsRNA         | -5.9  | 2574.9             | 1192.4 | 1382.5 | 20                       | 9.8  | 42   | 307     | 152 | 155 | 45           | 11  | 16   | 0      | -1020.0  | 0          | 145   | 325  | 91      |
| 2G4B   | A         | B       | 2.5    | rRNA          | -8.6  | 1161.4             | 542.4  | 619    | 10.9                     | 5.6  | 28.9 | 134     | 70  | 64  | 20           | 5   | 9    | 30     | -197.6   | 3          | 46    | 127  | 55      |
| 2PY9   | ABCD      | EF      | 2.56   | microRNA      | -7.6  | 3345.6             | 1606.7 | 1739   | 17.8                     | 9.8  | 30.7 | 372     | 179 | 193 | 60           | 19  | 10   | 63     | -3196.6  | -          | -     | -    | -       |
| 2QUX   | AB        | C       | 2.44   | Miscellaneous | 0.1   | 1753.6             | 800.8  | 952.7  | 11.2                     | 6.5  | 18.9 | 185     | 89  | 96  | 35           | 11  | 21   | 34     | -3122.4  | 3          | 105   | 125  | 69      |
| 2XS2   | A         | B       | 1.35   | mRNA          | -9.8  | 1298.2             | 606.3  | 691.9  | 19.7                     | 9.9  | 38.7 | 159     | 81  | 78  | 22           | 6   | 7    | 57     | -758.5   | 3          | 70    | 181  | 81      |
| 3AEV   | B         | C       | 2.8    | mRNA          | -9    | 2416               | 1131.3 | 1284.7 | 21.7                     | 10.8 | 41.7 | 260     | 133 | 127 | 40           | 11  | 19   | 97     | -2285.7  | 1          | 131   | 228  | 75      |
| 3BOY   | ABC       | D       | 1.7    | Miscellaneous | -31.9 | 4682.6             | 2082.1 | 2600.5 | 20.3                     | 9.6  | 43.9 | 587     | 312 | 275 | 92           | 22  | 29   | 7      | -        | 0          | 305   | 638  | 78      |
| 3BX2   | A         | C       | 2.84   | mRNA          | -5    | 2466.8             | 1097.3 | 1369.5 | 15.7                     | 7.2  | 48.5 | 249     | 129 | 120 | 42           | 9   | 18   | 0      | 30.7     | 10         | 170   | 316  | 71      |
| 3IAB   | AB        | R       | 2.7    | snRNA         | -20.8 | 5064.9             | 2387.7 | 2677.2 | 26.1                     | 16.3 | 27.2 | 534     | 266 | 268 | 79           | 29  | 30   | 80     | -12294.9 | 0          | 50    | 113  | 35      |
| 3IEV   | A         | D       | 1.9    | ssRNA         | -1.4  | 2272.6             | 1013.3 | 1259.4 | 14.7                     | 6.9  | 42   | 266     | 139 | 127 | 38           | 9   | 23   | 68     | -1670.3  | 2          | 140   | 330  | 82      |
| 3K49   | A         | B       | 2.5    | ssRNA         | 3.1   | 3080.8             | 1380.1 | 1700.7 | 17.1                     | 7.7  | 52   | 301     | 155 | 146 | 48           | 10  | 25   | 6      | 40.3     | 12         | 226   | 397  | 88      |
| 3MDG   | A         | C       | 2.22   | mRNA          | -6.8  | 1068.9             | 503.2  | 565.7  | 9.2                      | 4.6  | 33.7 | 128     | 67  | 61  | 23           | 6   | 6    | 56     | -232.0   | 3          | 52    | 138  | 74      |
| 3NNC   | A         | B       | 2.2    | ssRNA         | -10.3 | 1145.8             | 517.8  | 628    | 10                       | 4.9  | 32.1 | 113     | 60  | 53  | 22           | 5   | 4    | 59     | -475.3   | 2          | 40    | 156  | 77      |
| 3QJ    | A         | Q       | 2.8    | rRNA          | -4.1  | 3190.7             | 1489.5 | 1701.2 | 25.5                     | 12.1 | 50.6 | 348     | 179 | 169 | 50           | 12  | 26   | 88     | -2163.1  | 6          | 180   | 340  | 70      |
| 3R2C   | A         | R       | 1.9    | mRNA          | -8.7  | 2209.1             | 1004.1 | 1205   | 27.9                     | 13.1 | 48.6 | 249     | 130 | 119 | 36           | 9   | 7    | 36     | -1285.9  | 4          | 948   | 321  | 81      |
| 3R9W   | A         | B       | 2.05   | mRNA          | -8.8  | 2717.1             | 1236   | 1481   | 13.7                     | 8.6  | 18.3 | 306     | 152 | 154 | 44           | 15  | 23   | 75     | -3861.7  | 2          | 141   | 324  | 82      |
| 3TS2   | AB        | UV      | 2.01   | mRNA          | -14.6 | 6881.8             | 3266.4 | 3615.4 | 32.1                     | 19.4 | 31.3 | 764     | 372 | 392 | 90           | 37  | 50   | 81     | -9012.5  | 22         | 375   | 982  | 80      |
| 3V71   | A         | B       | 2.9    | rRNA          | -10.8 | 1951.9             | 875.6  | 1076.3 | 10.9                     | 4.9  | 50.9 | 202     | 106 | 96  | 30           | 7   | 17   | 75     | -317.7   | 6          | 142   | 249  | 87      |
| 3V74   | A         | B       | 2.3    | mRNA          | -3.3  | 3038.1             | 1366.2 | 1672   | 15.7                     | 7.2  | 49.8 | 312     | 161 | 151 | 47           | 11  | 24   | 17     | -772.3   | 12         | 192   | 386  | 87      |
| 3V7E   | A         | C       | 2.8    | mRNA          | -10   | 873.8              | 404.7  | 469.1  | 3.6                      | 9.8  | 2.3  | 98      | 38  | 60  | 16           | 6   | 4    | 0      | -4086.2  | 0          | 37    | 82   | 88      |
| 4ED5   | A         | D       | 2      | Miscellaneous | -17.9 | 2516.6             | 1181.8 | 1334.8 | 25.6                     | 11.9 | 55.4 | 272     | 147 | 125 | 43           | 10  | 23   | 91     | -1579.7  | 4          | 152   | 314  | 81      |
| 4ERD   | AB        | CD      | 2.59   | mRNA          | -10   | 3279.6             | 1589.8 | 1689.8 | 15.8                     | 10.1 | 20.1 | 373     | 180 | 193 | 45           | 18  | 9    | 69     | -6427.5  | 0          | 13    | 16   | 6       |
| 4JVY   | A         | D       | 2.85   | Miscellaneous | -3.2  | 1665.1             | 806.8  | 858.4  | 13.4                     | 6.6  | 45.5 | 180     | 86  | 94  | 28           | 7   | 8    | 89     | -597.1   | 1          | 109   | 171  | 82      |
| 4MDX   | AB        | C       | 1.5    | Miscellaneous | -8.7  | 2126.7             | 958.2  | 1168.5 | 18.9                     | 8.9  | 44.7 | 207     | 125 | 82  | 41           | 7   | 14   | 0      | 32.1     | 1          | 120   | 248  | 96      |
| Medium |           |         |        |               |       |                    |        |        |                          |      |      |         |     |     |              |     |      |        |          |            |       |      |         |
| 1ASZ   | A         | R       | 3      | tRNA          | -31.9 | 3865.6             | 1837.4 | 2028.2 | 11.7                     | 7.6  | 15.8 | 443     | 221 | 222 | 71           | 29  | 23   | 2      | 2042.6   | 0          | 100   | 113  | 28      |
| 1EFW   | A         | C       | 3      | tRNA          | -12.8 | 2044.7             | 1005   | 1039.7 | 5.2                      | 3.4  | 8.8  | 237     | 119 | 118 | 39           | 19  | 16   | 43     | 1224.1   | 0          | 19    | 12   | 5       |
| 1F7U   | A         | B       | 2.2    | tRNA          | -30.6 | 5135.4             | 2386.2 | 2749.2 | 14.1                     | 8.5  | 20.4 | 562     | 303 | 259 | 90           | 35  | 33   | 23     | -636.0   | 0          | 77    | 119  | 19      |
| 1GAX   | A         | C       | 2.9    | tRNA          | -27.2 | 5171.9             | 2501.7 | 2670.3 | 11.4                     | 6.6  | 20.6 | 605     | 308 | 297 | 100          | 40  | 24   | 1      | 5384.4   | 1          | 316   | 376  | 53      |
| 1GTR   | A         | B       | 2.5    | dsRNA         | -31   | 5318.4             | 2513.5 | 2804.9 | 16.8                     | 10.5 | 21.5 | 580     | 288 | 292 | 83           | 34  | 52   | 37     | 3442.9   | 0          | 362   | 391  | 70      |



|      |       |    |      |               |       |         |        |        |      |      |      |      |     |     |     |    |    |     |          |   |     |     |    |
|------|-------|----|------|---------------|-------|---------|--------|--------|------|------|------|------|-----|-----|-----|----|----|-----|----------|---|-----|-----|----|
| 1H3E | A     | B  | 2.9  | tRNA          | -22.8 | 2223.8  | 1087.9 | 1135.9 | 7.1  | 5.5  | 8.4  | 263  | 136 | 127 | 43  | 23 | 0  | 5   | -        | 0 | 9   | 16  | 7  |
| 1IL2 | A     | C  | 2.6  | Miscellaneous | -28   | 4085.8  | 1983.7 | 2102.2 | 11   | 6.9  | 16.6 | 449  | 228 | 221 | 72  | 27 | 40 | 1   | 4097.4   | 1 | 163 | 105 | 29 |
| 1OOA | A     | C  | 2.45 | tRNA          | -17.1 | 1909.3  | 996.5  | 912.8  | 9.3  | 5.9  | 16.8 | 217  | 98  | 119 | 28  | 19 | 20 | 54  | -2651.5  | 3 | 78  | 108 | 57 |
| 1Q2R | ABCD  | EF | 2.9  | vRNA          | -18.5 | 6034.4  | 2841.3 | 3193.1 | 11   | 5.4  | 39.8 | 626  | 325 | 301 | 103 | 32 | 30 | 60  | -7793.2  | 0 | 430 | 472 | 61 |
| 1QF6 | A     | B  | 2.9  | snRNA         | -29.3 | 4228.5  | 2079   | 2149   | 10.8 | 6.8  | 16.5 | 459  | 223 | 236 | 70  | 27 | 28 | 14  | 5924.2   | 2 | 106 | 156 | 37 |
| 1U0B | B     | A  | 2.3  | Miscellaneous | -27   | 4557.2  | 2150.9 | 2406.3 | 16.1 | 10.6 | 19.2 | 526  | 276 | 250 | 85  | 32 | 25 | 15  | -        | 2 | 254 | 339 | 66 |
| 1YTU | A     | CD | 2.5  | mRNA          | -13.1 | 1851.6  | 800.2  | 1051.4 | 9.4  | 4.1  | 47.2 | 213  | 120 | 93  | 32  | 7  | 14 | 97  | -1174.4  | 0 | 56  | 29  | 16 |
| 1ZBH | AD    | EF | 3    | crRNA         | -32.7 | 3470.7  | 1744.5 | 1726.2 | 10.7 | 5.9  | 27.2 | 383  | 185 | 198 | 53  | 24 | 16 | 43  | -5873.2  | 2 | 211 | 215 | 57 |
| 1ZL3 | A     | B  | 2.8  | dsRNA         | -17.9 | 2547.9  | 1207.3 | 1340.6 | 15.2 | 8    | 31.6 | 279  | 141 | 138 | 44  | 12 | 22 | 89  | -850.0   | 1 | 134 | 128 | 55 |
| 2AB4 | A     | B  | 2.4  | tRNA          | -18   | 2557.2  | 1236.1 | 1321.1 | 15.4 | 8.1  | 34.4 | 289  | 149 | 140 | 44  | 12 | 18 | 91  | -3446.7  | 1 | 134 | 150 | 50 |
| 2AZX | A     | C  | 2.8  | tRNA          | -10.2 | 1363.2  | 648.2  | 715    | 4.8  | 3.7  | 5.9  | 156  | 82  | 74  | 23  | 12 | 12 | 4   | 2043.4   | - | -   | -   | -  |
| 2BH2 | A     | C  | 2.15 | tRNA          | -14.5 | 4042.5  | 1978.9 | 2063.6 | 18.9 | 10.3 | 33.4 | 436  | 224 | 212 | 70  | 24 | 36 | 83  | -2537.9  | 4 | 206 | 288 | 50 |
| 2BX2 | L     | R  | 2.85 | tRNA          | -10.3 | 912.2   | 419    | 493.2  | 3.1  | 1.6  | 13.4 | 94   | 50  | 44  | 20  | 4  | 5  | 100 | -        | 0 | 67  | 67  | 50 |
| 2CSX | A     | C  | 2.7  | tRNA          | -12.7 | 2182.3  | 1040.6 | 1141.8 | 7    | 5    | 8.9  | 260  | 129 | 131 | 40  | 22 | 15 | 20  | -3755.6  | 3 | 152 | 206 | 53 |
| 2CV0 | A     | C  | 2.4  | Miscellaneous | -34.2 | 4517    | 2117.3 | 2399.8 | 15.1 | 9.8  | 18.8 | 506  | 265 | 241 | 88  | 33 | 34 | 36  | -747.7   | 2 | 303 | 329 | 63 |
| 2FK6 | A     | R  | 2.9  | tRNA          | -9.5  | 1531.1  | 750.6  | 780.5  | 6.9  | 5.2  | 8.5  | 194  | 91  | 103 | 23  | 17 | 9  | 35  | 1312.6   | 0 | 90  | 122 | 70 |
| 2FMT | A     | C  | 2.8  | rRNA          | -19.2 | 2940.7  | 1498.5 | 1442.2 | 11.5 | 9.8  | 11   | 319  | 151 | 168 | 43  | 25 | 24 | 26  | -2010.8  | 1 | 122 | 154 | 56 |
| 2GIC | ABCDE | R  | 2.92 | piRNA         | -76.8 | 10344.6 | 5098.9 | 5245.7 | 10.6 | 5.2  | 48.5 | 1150 | 579 | 571 | 185 | 45 | 61 | 79  | -6111.6  | 5 | 731 | 668 | 45 |
| 2I82 | AB    | EF | 2.05 | Miscellaneous | -26.9 | 5812    | 2852.2 | 2959.8 | 23.2 | 12.6 | 36.1 | 615  | 329 | 286 | 86  | 26 | 26 | 93  | -6584.1  | - | -   | -   | -  |
| 2I91 | A     | CD | 2.65 | Miscellaneous | -29.4 | 3893.6  | 1856.5 | 2037.1 | 16.4 | 8    | 44.6 | 432  | 221 | 211 | 65  | 17 | 31 | 94  | -3919.1  | 2 | 297 | 251 | 63 |
| 2OZB | AB    | C  | 2.6  | mRNA          | -26.5 | 2569    | 1261.3 | 1307.8 | 11   | 6.4  | 21.1 | 272  | 126 | 146 | 42  | 17 | 20 | 71  | -3058.0  | 1 | 148 | 200 | 63 |
| 2R8S | HL    | R  | 1.95 | mRNA          | -25.2 | 2509.9  | 1193.6 | 1316.2 | 6    | 6.3  | 5.1  | 271  | 128 | 133 | 42  | 27 | 24 | 17  | -8204.8  | 0 | 162 | 204 | 74 |
| 2XDB | A     | G  | 2.55 | ssRNA         | -20   | 1882.8  | 875    | 1007.8 | 13.6 | 9.9  | 14.8 | 210  | 105 | 105 | 34  | 11 | 12 | 79  | -3026.9  | 1 | 88  | 158 | 53 |
| 2XZO | A     | D  | 2.4  | Miscellaneous | -30.7 | 2005.8  | 937.1  | 1068.7 | 7.4  | 3.4  | 65.6 | 209  | 114 | 95  | 42  | 7  | 18 | 83  | -        | 0 | 127 | 163 | 62 |
| 2Y8Y | A     | B  | 1.44 | Miscellaneous | -19.9 | 2167.1  | 1065.7 | 1101.4 | 16.7 | 9.7  | 26.7 | 234  | 118 | 116 | 35  | 16 | 17 | 100 | -4021.5  | 0 | 32  | 45  | 23 |
| 2ZI0 | AB    | CD | 2.82 | microRNA      | -44.9 | 4573.3  | 2340.1 | 2233.2 | 31   | 19.4 | 30.7 | 470  | 208 | 262 | 54  | 39 | 43 | 95  | -        | 5 | 321 | 209 | 54 |
| 2ZUE | A     | B  | 2    | ssRNA         | -21.5 | 4591.6  | 2226   | 2365.6 | 12.2 | 7.6  | 18.4 | 509  | 249 | 260 | 76  | 39 | 25 | 6   | 2992.4   | 0 | 276 | 364 | 61 |
| 2ZZN | A     | C  | 2.95 | Miscellaneous | -27.3 | 4361.2  | 2162.4 | 2198.8 | 16.5 | 11.8 | 17.7 | 478  | 238 | 240 | 71  | 35 | 31 | 92  | -14109.7 | 0 | 271 | 310 | 55 |
| 3ADC | A     | C  | 2.9  | Miscellaneous | -26.6 | 3386.9  | 1733.5 | 1653.4 | 12   | 10.4 | 11   | 371  | 176 | 195 | 52  | 32 | 24 | 46  | -10474.6 | - | -   | -   | -  |
| 3AMT | A     | B  | 2.9  | tRNA          | -17.2 | 3818.9  | 1826.2 | 1992.7 | 12.4 | 8.7  | 14.5 | 410  | 219 | 191 | 64  | 26 | 29 | 28  | -        | - | -   | -   | -  |
| 3BT7 | AB    | CD | 2.43 | rRNA          | -32.3 | 3593.8  | 1646.3 | 1947.5 | 9.7  | 4.9  | 28.2 | 418  | 239 | 179 | 68  | 21 | 19 | 74  | 225.0    | 2 | 260 | 210 | 64 |
| 3DD2 | H     | B  | 1.9  | ssRNA         | -7.9  | 1508.3  | 718.5  | 789.9  | 10.1 | 5.8  | 19.5 | 159  | 77  | 82  | 23  | 11 | 13 | 87  | -2068.3  | - | -   | -   | -  |
| 3DH3 | AB    | EF | 3    | snRNA         | -34.9 | 6061.2  | 3057.4 | 3003.8 | 21.5 | 11.7 | 36.6 | 661  | 335 | 326 | 96  | 35 | 42 | 90  | -        | 2 | 116 | 79  | 13 |
| 3EPH | A     | E  | 2.95 | siRNA         | -37.7 | 4814.4  | 2297.4 | 2517.1 | 16.9 | 10.7 | 21.5 | 516  | 273 | 243 | 79  | 27 | 41 | 96  | -11470.2 | 4 | 376 | 365 | 56 |
| 3FOZ | B     | D  | 2.5  | tRNA          | -25.8 | 4175.8  | 2077.7 | 2098.1 | 13.3 | 17.5 | 17.9 | 422  | 220 | 202 | 64  | 19 | 33 | 72  | 623.9    | 2 | 293 | 296 | 67 |
| 3LWQ | ABC   | DE | 2.68 | tRNA          | -29.7 | 5251.9  | 2527.7 | 2724.1 | 17.2 | 11.3 | 20.6 | 569  | 263 | 306 | 84  | 39 | 40 | 40  | -4166.8  | 1 | 305 | 416 | 72 |
| 3MOJ | B     | A  | 2.9  | tRNA          | -9.5  | 1758.4  | 856.7  | 901.7  | 11   | 18.7 | 6.9  | 204  | 86  | 118 | 26  | 15 | 12 | 69  | -7871.8  | 2 | 102 | 143 | 73 |
| 3NVI | AB    | E  | 2.71 | Miscellaneous | -33.5 | 3782.5  | 1836.4 | 1946.1 | 18.9 | 9.7  | 40.3 | 395  | 185 | 210 | 58  | 23 | 36 | 84  | -3223.6  | 1 | 241 | 293 | 74 |
| 3O3I | X     | A  | 2.8  | tRNA          | -10.2 | 923     | 404.6  | 518.3  | 10.1 | 6.1  | 15.2 | 104  | 59  | 45  | 19  | 5  | 19 | 26  | -        | 0 | 74  | 88  | 74 |
| 3O8C | A     | C  | 2    | tRNA          | -17.2 | 1811.8  | 850.7  | 961.1  | 6.7  | 3.1  | 61.7 | 187  | 108 | 79  | 34  | 5  | 11 | 23  | -278.2   | 1 | 94  | 116 | 47 |
| 3RC8 | A     | E  | 2.9  | mRNA          | -12.9 | 1470.6  | 668.1  | 802.5  | 5    | 2.3  | 57.3 | 166  | 91  | 75  | 30  | 6  | 11 | 0   | -6.8     | 0 | 114 | 83  | 50 |
| 3RW6 | AB    | FH | 2.3  | Miscellaneous | -18.4 | 5338.1  | 2605   | 2733   | 12.5 | 9.5  | 13.3 | 594  | 285 | 309 | 89  | 56 | 7  | 45  | -11132.6 | 3 | 244 | 443 | 61 |
| 3SNP | AB    | CD | 2.8  | rRNA          | -25.6 | 5698.8  | 2691.2 | 3007.7 | 7.8  | 4    | 27.2 | 644  | 343 | 301 | 120 | 37 | 29 | 13  | -4964.8  | 0 | 363 | 408 | 58 |
| 3T5N | A     | C  | 1.79 | tRNA          | -11.4 | 1909.5  | 857.1  | 1052.5 | 14.5 | 6.4  | 62.1 | 209  | 121 | 88  | 38  | 6  | 20 | 100 | -1024.7  | 3 | 192 | 174 | 55 |

|      |      |      |      |               |        |         |        |        |      |      |      |      |     |     |     |    |    |     |          |    |     |      |    |
|------|------|------|------|---------------|--------|---------|--------|--------|------|------|------|------|-----|-----|-----|----|----|-----|----------|----|-----|------|----|
| 4ARC | A    | B    | 2    | tRNA          | -32    | 4602.9  | 2216.6 | 2386.2 | 10.1 | 5.9  | 18.7 | 514  | 259 | 255 | 77  | 33 | 24 | 3   | 7959.2   | 1  | 201 | 265  | 47 |
| 4ATO | A    | G    | 2.2  | tRNA          | -12.4  | 2264    | 1103.4 | 1160.6 | 16.3 | 11.3 | 18.2 | 244  | 119 | 125 | 33  | 12 | 26 | 88  | -2527.0  | 2  | 160 | 181  | 73 |
| 4C7O | BD   | E    | 2.6  | rRNA          | -12.5  | 2554.3  | 1194.4 | 1359.9 | 8    | 4.6  | 15.7 | 296  | 147 | 149 | 41  | 22 | 9  | 5   | 2699.3   | 2  | 190 | 246  | 73 |
| 4F3T | A    | R    | 2.25 | tRNA          | -34.4  | 4012.3  | 1766.3 | 2246   | 10.5 | 4.6  | 59.5 | 420  | 232 | 188 | 79  | 14 | 39 | 96  | -7116.6  | 1  | 333 | 352  | 63 |
| 4H5P | AB   | E    | 2.15 | tRNA          | -59.4  | 4482.1  | 2172.3 | 2309.8 | 18.6 | 8.6  | 66.3 | 464  | 253 | 211 | 76  | 14 | 25 | 97  | -4439.8  | 2  | 284 | 449  | 57 |
| 4ILL | AB   | CR   | 2.48 | crRNA         | -37.3  | 7074.1  | 3270.8 | 3803.2 | 25.7 | 12.8 | 42.4 | 757  | 385 | 372 | 114 | 33 | 61 | 83  | -        | 1  | 437 | 607  | 67 |
| 4JNG | ABCD | L    | 2.12 | Miscellaneous | -131.2 | 11308.9 | 5548.5 | 5760.4 | 25.6 | 12.2 | 58.9 | 1208 | 624 | 584 | 172 | 42 | 69 | 89  | -15264.6 | 11 | 594 | 1006 | 61 |
| 4KR6 | AB   | CD   | 2.85 | Miscellaneous | -22.1  | 5756    | 2751.9 | 3004.1 | 13.7 | 8.5  | 19.6 | 652  | 321 | 331 | 98  | 44 | 33 | 39  | -14237.3 | 0  | 363 | 420  | 64 |
| 4LGT | A    | E    | 1.3  | Miscellaneous | -28    | 3375.5  | 1680.9 | 1694.6 | 23.5 | 12.6 | 38.1 | 370  | 184 | 186 | 52  | 17 | 32 | 77  | -2633.6  | 0  | 38  | 1    | 2  |
| 4M59 | AB   | CD   | 2.46 | tRNA          | -56    | 7841.6  | 3664.4 | 4177.2 | 12.4 | 5.9  | 50.7 | 871  | 456 | 415 | 156 | 30 | 25 | 39  | -        | 6  | 428 | 730  | 60 |
| 4N0T | A    | B    | 1.7  | tRNA          | -19.9  | 5505.8  | 2648.8 | 2857   | 19.6 | 12.9 | 21.9 | 617  | 310 | 307 | 79  | 30 | 0  | 67  | -11090.9 | 8  | 352 | 671  | 72 |
| 4NGC | A    | B    | 2.1  | Miscellaneous | -12.2  | 1021.1  | 440.3  | 580.8  | 6    | 2.9  | 19.4 | 123  | 71  | 52  | 27  | 7  | 0  | 96  | -1132.5  | 1  | 96  | 118  | 56 |
| Low  |      |      |      |               |        |         |        |        |      |      |      |      |     |     |     |    |    |     |          |    |     |      |    |
| 1DFU | P    | MN   | 1.8  | rRNA          | -20.2  | 1687.9  | 828.2  | 859.7  | 19.5 | 11.8 | 17.2 | 172  | 84  | 88  | 26  | 19 | 19 | 73  | -3741.2  | 0  | 86  | 78   | 54 |
| 1DI2 | AB   | CDEG | 1.9  | rRNA          | -23.9  | 2255.6  | 1178.4 | 1077.3 | 14   | 12   | 14.8 | 237  | 107 | 130 | 32  | 22 | 9  | 97  | -4985.1  | 0  | 149 | 139  | 60 |
| 1F7Y | A    | B    | 2.8  | tRNA          | -27.6  | 2426.6  | 1220.2 | 1206.5 | 13.3 | 13.2 | 15.3 | 265  | 130 | 135 | 33  | 22 | 19 | 67  | -6690.5  | -  | -   | -    | -  |
| 1G1X | ABC  | DE   | 2.6  | ssRNA         | -45.4  | 4944.1  | 2426.4 | 2517.7 | 16.2 | 17.9 | 20.5 | 546  | 270 | 276 | 70  | 47 | 35 | 61  | -18347.4 | 1  | 252 | 223  | 58 |
| 1I6U | A    | C    | 2.6  | Miscellaneous | -11.6  | 1801.5  | 885.1  | 916.4  | 11.6 | 14   | 14.6 | 213  | 106 | 107 | 30  | 19 | 16 | 90  | -6090.4  | 0  | 20  | 27   | 17 |
| 1IID | A    | B    | 1.8  | crRNA         | -13.6  | 1362.1  | 665.8  | 696.4  | 9.5  | 13   | 12.4 | 142  | 69  | 73  | 25  | 9  | 12 | 100 | -4365.2  | 2  | 121 | 56   | 40 |
| 1L9A | A    | B    | 2.9  | dsRNA         | -25.8  | 2210.2  | 1074.4 | 1135.7 | 18.5 | 5.3  | 8.8  | 236  | 107 | 129 | 27  | 21 | 22 | 96  | -13982.7 | 0  | 185 | 126  | 63 |
| 1MJI | AB   | CD   | 2.5  | dsRNA         | -36.6  | 5602.4  | 2776.6 | 2825.8 | 13   | 24.4 | 20.5 | 611  | 289 | 322 | 81  | 47 | 37 | 73  | -16485.6 | 0  | 23  | 28   | 7  |
| 1MZP | A    | B    | 2.65 | dsRNA         | -26.5  | 2883.3  | 1474   | 1409.4 | 12.5 | 15.6 | 16   | 296  | 139 | 157 | 37  | 26 | 31 | 97  | -14273.9 | 0  | 11  | 3    | 5  |
| 1N35 | A    | BC   | 2.5  | dsRNA         | -31.6  | 3243.9  | 1557.6 | 1686.3 | 3.3  | 55.3 | 6.9  | 355  | 189 | 166 | 71  | 13 | 17 | 93  | -1922.5  | 0  | 200 | 183  | 49 |
| 1QU3 | A    | T    | 2.9  | dsRNA         | -36.9  | 4847.5  | 2468.5 | 2379   | 6.3  | 18.7 | 10.2 | 543  | 270 | 273 | 72  | 37 | 32 | 18  | 18109.1  | 0  | 350 | 346  | 65 |
| 1RPU | AB   | CD   | 2.5  | dsRNA         | -36    | 3917.8  | 1877.5 | 2040.4 | 13.1 | 24.6 | 21   | 433  | 214 | 219 | 66  | 27 | 40 | -   | -5572.0  | 2  | 218 | 254  | 59 |
| 1S03 | H    | A    | 2.7  | dsRNA         | -16    | 1743.1  | 847.8  | 895.3  | 11.1 | 10.4 | 12   | 204  | 101 | 103 | 29  | 16 | 10 | 86  | -4105.7  | 0  | 110 | 133  | 72 |
| 1SER | AB   | T    | 2.9  | tRNA          | -18.7  | 2259    | 1121.3 | 1137.7 | 3.4  | 10.3 | 5.4  | 265  | 126 | 139 | 40  | 17 | 11 | 20  | -        | 0  | 66  | 70   | 30 |
| 1WSU | ABC  | EFG  | 2.3  | dsRNA         | -32.2  | 2631.4  | 1283.2 | 1348.3 | 5.1  | 11.4 | 7.6  | 268  | 125 | 143 | 39  | 18 | 27 | 46  | -4986.2  | 2  | 214 | 123  | 51 |
| 1Y39 | A    | C    | 2.8  | Miscellaneous | -18.1  | 1988.8  | 993.1  | 995.7  | 19.4 | 12.1 | 17.6 | 212  | 97  | 115 | 30  | 19 | 16 | 83  | -3276.1  | 0  | 192 | 189  | 87 |
| 2AZ2 | AB   | CD   | 2.6  | dsRNA         | -20.6  | 2043    | 976    | 1067   | 12.7 | 15.9 | 16.6 | 214  | 115 | 99  | 30  | 14 | 13 | 17  | -1657.3  | 0  | 18  | 20   | 13 |
| 2BTE | A    | B    | 2.9  | Miscellaneous | -28.1  | 3430.9  | 1689.3 | 1741.6 | 4.3  | 12.8 | 7    | 379  | 184 | 195 | 63  | 29 | 21 | 0   | 6855.2   | 0  | 168 | 190  | 46 |
| 2HW8 | A    | B    | 2.1  | dsRNA         | -34.4  | 2334.7  | 1121.6 | 1213.1 | 9.5  | 18.9 | 14.6 | 271  | 142 | 129 | 35  | 21 | 16 | 34  | -4690.2  | 0  | 17  | 14   | 9  |
| 2J0S | A    | E    | 2.21 | dsRNA         | -21.3  | 1310.4  | 538.8  | 771.6  | 3.1  | 47.4 | 7.3  | 150  | 79  | 71  | 28  | 6  | 19 | 0   | -505.5   | 0  | 167 | 97   | 71 |
| 2JLU | A    | C    | 2.04 | dsRNA         | -17.8  | 1925.2  | 846    | 1079.2 | 40   | 64.8 | 9.2  | 209  | 121 | 88  | 39  | 7  | 14 | 95  | -        | 0  | 158 | 136  | 67 |
| 2V3C | AC   | M    | 2.5  | dsRNA         | -43.7  | 5181.3  | 2547.9 | 2633.4 | 9.3  | 16.9 | 13.8 | 592  | 280 | 312 | 82  | 50 | 0  | 54  | -19704.8 | 1  | 350 | 321  | 62 |
| 2XLI | A    | B    | 2.33 | dsRNA         | -11.9  | 1566.3  | 830.1  | 736.2  | 8.4  | 25.6 | 14.1 | 145  | 76  | 69  | 26  | 12 | 16 | 65  | -        | 2  | 116 | 101  | 35 |
| 2ZH9 | A    | B    | 2.9  | rRNA          | -18.8  | 2425.2  | 1141.8 | 1283.4 | 4.8  | 21   | 8.9  | 275  | 148 | 127 | 42  | 16 | 13 | 21  | -2174.3  | 0  | 182 | 198  | 67 |
| 2ZKO | AB   | CD   | 1.7  | rRNA          | -29    | 2465.8  | 1238.1 | 1227.6 | 14.3 | 15.6 | 17.6 | 264  | 128 | 136 | 34  | 20 | 11 | 56  | -4146.9  | 0  | 161 | 173  | 65 |
| 3AVW | A    | GT   | 2.6  | rRNA          | -30.3  | 3382.2  | 1613.7 | 1768.4 | 3    | 43.3 | 6.3  | 374  | 195 | 179 | 73  | 20 | 14 | 7   | -        | 0  | 182 | 183  | 49 |
| 3EQT | AB   | CD   | 2    | Miscellaneous | -20    | 2705.3  | 1215.9 | 1489.4 | 7.3  | 48.1 | 15.9 | 285  | 141 | 144 | 48  | 16 | 20 | 81  | -4117.2  | 0  | 208 | 253  | 74 |
| 3FTF | A    | CD   | 2.8  | rRNA          | -19    | 1693.3  | 841.6  | 851.7  | 6.8  | 10.8 | 9.1  | 179  | 89  | 90  | 28  | 18 | 5  | 96  | -5610.3  | 0  | 93  | 77   | 54 |
| 3H5X | A    | PT   | 1.77 | rRNA          | -35.6  | 3095.8  | 1458.2 | 1637.6 | 6.7  | 48.1 | 13.9 | 325  | 179 | 146 | 65  | 16 | 21 | 83  | -1199.8  | 0  | 185 | 94   | 14 |
| 3NL0 | A    | BC   | 2.6  | dsRNA         | -26.5  | 2720.6  | 1238.5 | 1482   | 5.9  | 54.7 | 12.9 | 312  | 169 | 143 | 59  | 13 | 19 | 69  | 479.8    | 0  | 235 | 193  | 63 |
| 3R2D | ABJK | RS   | 2.2  | tRNA          | -31.6  | 2090.3  | 1014.8 | 1075.5 | 4.5  | 25.9 | 8.5  | 224  | 118 | 106 | 40  | 14 | 11 | 90  | -6266.9  | 0  | 148 | 77   | 60 |

|      |      |      |      |               |       |        |        |        |      |      |      |     |     |     |    |    |    |     |          |   |     |     |    |
|------|------|------|------|---------------|-------|--------|--------|--------|------|------|------|-----|-----|-----|----|----|----|-----|----------|---|-----|-----|----|
| 3TMI | A    | BC   | 2.7  | siRNA         | -32.9 | 2828.7 | 1300.5 | 1528.2 | 4    | 33.3 | 8.2  | 332 | 181 | 151 | 61 | 21 | 14 | 98  | -        | 1 | 211 | 200 | 56 |
| 3VJR | A    | B    | 2.4  | tRNA          | -12.8 | 1354.3 | 689.9  | 664.3  | 7.5  | 10   | 9.4  | 144 | 63  | 81  | 20 | 15 | 11 | 55  | -1976.3  | 0 | 82  | 75  | 75 |
| 3VYY | AB   | CDEF | 2.9  | mRNA          | -35.2 | 3073.9 | 1550.1 | 1523.9 | 13.3 | 21.3 | 19.5 | 349 | 168 | 181 | 40 | 25 | 3  | 50  | -6151.8  | 0 | 179 | 217 | 68 |
| 3WBM | ABCD | XY   | 2    | dsRNA         | -31.5 | 2348.8 | 1173.5 | 1175.3 | 6.5  | 12.6 | 9.3  | 244 | 115 | 129 | 32 | 23 | 18 | 100 | -20163.4 | 0 | 149 | 76  | 51 |
| 3ZC0 | AB   | M    | 2.98 | mRNA          | -9.5  | 814    | 414.7  | 399.4  | 2    | 12.4 | 3.6  | 84  | 39  | 45  | 17 | 6  | 0  | 27  | -        | 0 | 41  | 12  | 15 |
| 4E78 | A    | PT   | 2.9  | mRNA          | -15.7 | 1674.8 | 783    | 891.8  | 3.4  | 47   | 7.3  | 193 | 108 | 85  | 43 | 8  | 8  | 98  | -2092.3  | 0 | 93  | 94  | 44 |
| 4FVU | A    | BC   | 2.91 | tRNA          | -10   | 1240.1 | 574.5  | 665.7  | 5.2  | 21.4 | 9.6  | 139 | 72  | 67  | 24 | 9  | 10 | 12  | -        | 1 | 88  | 96  | 58 |
| 4GHA | ACEG | IJ   | 2.5  | mRNA          | -34.5 | 3690.9 | 1774   | 1916.9 | 7.2  | 41.8 | 14.5 | 395 | 207 | 188 | 71 | 23 | 19 | 65  | -7419.2  | 0 | 216 | 240 | 60 |
| 4IG8 | A    | BC   | 2.7  | Miscellaneous | -22.3 | 2914   | 1415.2 | 1498.8 | 8.4  | 22.9 | 14.3 | 316 | 166 | 150 | 46 | 20 | 23 | 87  | -5071.9  | 0 | 126 | 123 | 39 |
| 4K4T | A    | BC   | 2.75 | Miscellaneous | -34.1 | 3724.2 | 1758.1 | 1966.1 | 8.2  | 32.8 | 15.7 | 426 | 227 | 199 | 72 | 21 | 22 | 78  | 119.2    | 0 | 242 | 266 | 58 |
| 4K50 | A    | BC   | 2.93 | dsRNA         | -37.1 | 4061.9 | 1916.1 | 2145.7 | 8.9  | 23.8 | 15.4 | 450 | 242 | 208 | 75 | 23 | 24 | 77  | -762.6   | 0 | 267 | 279 | 64 |
| 4OOG | C    | D    | 2.5  | Miscellaneous | -26.8 | 3053.4 | 1504   | 1549.4 | 9.8  | 23.4 | 16.1 | 326 | 160 | 166 | 45 | 22 | 5  | 73  | -4854.8  | 2 | 200 | 227 | 73 |

**Table S3.** Numbers of different types of RNAs in three classes.

| type         | ssRNA | dsRNA | mRNA | tRNA | rRNA | Other | All |
|--------------|-------|-------|------|------|------|-------|-----|
| High class   | 6     | 1     | 13   | 0    | 4    | 9     | 33  |
| Medium class | 3     | 2     | 4    | 25   | 4    | 23    | 61  |
| Low class    | 1     | 17    | 4    | 5    | 7    | 9     | 43  |

**Table S4.** Detailed information of the AAC and AAP in each class.

| Type   | Ala   | Phe   | Gly   | Ile  | Leu   | Met  | Pro   | Val   | Asp   | Glu   | Lys   | Arg   | Cys   | His  | Asn   | Gln   | Ser   | Thr   | Trp  | Tyr  |
|--------|-------|-------|-------|------|-------|------|-------|-------|-------|-------|-------|-------|-------|------|-------|-------|-------|-------|------|------|
| High   |       |       |       |      |       |      |       |       |       |       |       |       |       |      |       |       |       |       |      |      |
| AAC    | 3.62  | 4.94  | 7.64  | 5.86 | 6.39  | 1.45 | 2.96  | 4.48  | 4.87  | 5.33  | 12.18 | 10.34 | 1.053 | 4.28 | 5.33  | 5.13  | 4.74  | 3.29  | 0.00 | 0.06 |
| AAP    | -0.29 | 0.77  | 0.04  | 0.44 | 0.12  | 0.20 | -0.42 | 0.19  | -0.53 | -0.84 | 0.13  | 0.42  | 0.96  | 0.20 | -0.06 | -0.03 | -0.18 | -0.46 | 0.51 | 0.84 |
| Medium |       |       |       |      |       |      |       |       |       |       |       |       |       |      |       |       |       |       |      |      |
| AAC    | 5.45  | 3.37  | 5.50  | 3.34 | 5.24  | 1.75 | 4.61  | 4.71  | 4.69  | 5.14  | 10.99 | 13.91 | 0.81  | 3.17 | 6.51  | 3.60  | 7.02  | 5.04  | 0.01 | 0.04 |
| AAP    | -0.08 | 0.50  | -0.30 | 0.17 | 0.01  | 0.20 | -0.21 | 0.10  | -0.55 | -0.86 | 0.07  | 0.61  | 0.40  | 0.38 | 0.38  | -0.37 | 0.12  | -0.04 | 0.27 | 0.47 |
| Low    |       |       |       |      |       |      |       |       |       |       |       |       |       |      |       |       |       |       |      |      |
| AAC    | 4.42  | 2.05  | 7.45  | 3.49 | 4.93  | 1.90 | 4.52  | 4.42  | 5.29  | 4.88  | 12.63 | 13.92 | 1.18  | 2.52 | 4.88  | 4.16  | 7.04  | 6.06  | 0.01 | 0.03 |
| AAP    | -0.22 | -0.16 | 0.06  | 0.17 | -0.11 | 0.24 | -0.30 | -0.02 | -0.38 | -0.93 | 0.16  | 0.54  | 0.90  | 0.21 | 0.09  | 0.02  | 0.19  | 0.19  | 0.29 | 0.17 |

**Table S5.** Detailed information of the SSC and SSP in each class.

| Type   | $\alpha$ -helix | $\beta$ -strand | $3_{10}$ -helix | Turn  | coil  | Bridge | non-regular <sup>a</sup> |
|--------|-----------------|-----------------|-----------------|-------|-------|--------|--------------------------|
| High   |                 |                 |                 |       |       |        |                          |
| SSC    | 0.30            | 0.33            | 0.06            | 0.16  | 0.15  | 0.00   | 0.37                     |
| SSP    | -0.16           | 0.67            | 0.67            | -0.22 | -0.26 | -4.47  | -0.26                    |
| Medium |                 |                 |                 |       |       |        |                          |
| SSC    | 0.32            | 0.14            | 0.06            | 0.25  | 0.21  | 0.02   | 0.54                     |
| SSP    | -0.16           | 0.14            | 0.48            | 0.09  | -0.07 | 0.48   | 0.07                     |
| Low    |                 |                 |                 |       |       |        |                          |
| SSC    | 0.36            | 0.17            | 0.04            | 0.20  | 0.21  | 0.01   | 0.47                     |
| SSP    | -0.05           | 0.35            | 0.01            | -0.11 | -0.07 | 0.45   | -0.07                    |

<sup>a</sup> $3_{10}$ -helix, turn, coil and bridge are together deemed as the non-regular regions.

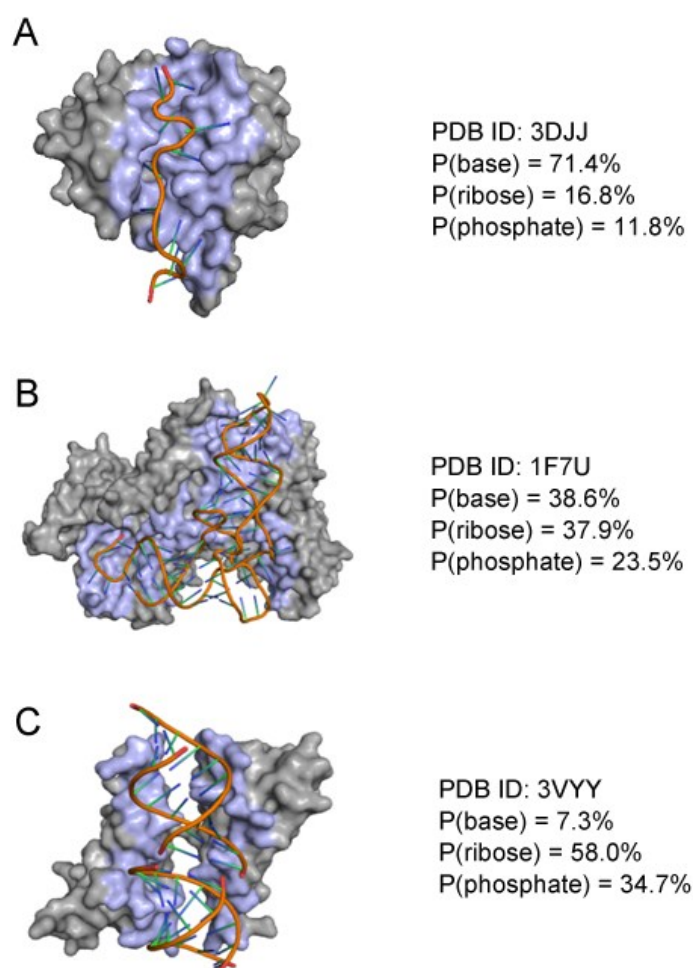

**Figure S1.** The 3D structures of three representative complexes in High, Medium and Low class, respectively. The protein interface region is colored lightblue.
